# Supplementary material
Source: PubMed Central journal article supplement (PMC6166474)
Supplement: NIHMS916878-supplement-supplemental_files.pdf [file NIHMS916878-supplement-supplemental_files.pdf]

## Supplemental

### Figure 5 c, d, and e

These tables show the top 30 two-step transition probabilities associated with each reduced Markov diagram for (c)  $EGFR^m$  and (d)  $EGFR^{wt}$ . Spreader/sponge factors can be found in (e) and were computed directly from the probabilities found in (c) and (d). Nodes are classified as a “spreader” (red) or “sponge” (blue) based on the ratio of their outgoing and incoming probabilities.

| C   | Primary     | Step 1        | Step 2        | Probability | d   | Primary     | Step 1        | Step 2        | Probability |
|-----|-------------|---------------|---------------|-------------|-----|-------------|---------------|---------------|-------------|
| 1.  | Lung/pleura | → Bone        | → Lung/pleura | 11.48%      | 1.  | Lung/pleura | → Bone        | → Lung/pleura | 18.74%      |
| 2.  | Lung/pleura | → Lung/pleura | → Lung/pleura | 10.72%      | 2.  | Lung/pleura | → Lung/pleura | → Lung/pleura | 6.42%       |
| 3.  | Lung/pleura | → Lung/pleura | → Bone        | 6.43%       | 3.  | Lung/pleura | → Lung/pleura | → Bone        | 6.42%       |
| 4.  | Lung/pleura | → Deceased    | → Deceased    | 5.36%       | 4.  | Lung/pleura | → Deceased    | → Deceased    | 6.22%       |
| 5.  | Lung/pleura | → Lung/pleura | → Brain       | 4.68%       | 5.  | Lung/pleura | → Liver       | → LN (dist)   | 5.87%       |
| 6.  | Lung/pleura | → Lung/pleura | → Liver       | 4.09%       | 6.  | Lung/pleura | → Lung/pleura | → Liver       | 3.72%       |
| 7.  | Lung/pleura | → Brain       | → Lung/pleura | 4.03%       | 7.  | Lung/pleura | → LN (dist)   | → Brain       | 3.56%       |
| 8.  | Lung/pleura | → Liver       | → Brain       | 3.45%       | 8.  | Lung/pleura | → Lung/pleura | → LN (dist)   | 2.93%       |
| 9.  | Lung/pleura | → Liver       | → LN (dist)   | 3.45%       | 9.  | Lung/pleura | → Brain       | → Adrenal     | 2.64%       |
| 10. | Lung/pleura | → Bone        | → Bone        | 3.02%       | 10. | Lung/pleura | → Liver       | → Deceased    | 2.57%       |
| 11. | Lung/pleura | → Lung/pleura | → LN (dist)   | 2.73%       | 11. | Lung/pleura | → Lung/pleura | → Brain       | 2.48%       |
| 12. | Lung/pleura | → Brain       | → Deceased    | 2.56%       | 12. | Lung/pleura | → Liver       | → Bone        | 2.20%       |
| 13. | Lung/pleura | → Brain       | → Bone        | 2.56%       | 13. | Lung/pleura | → Brain       | → Bone        | 2.11%       |
| 14. | Lung/pleura | → LN (dist)   | → Lung/pleura | 2.27%       | 14. | Lung/pleura | → Bone        | → Liver       | 2.11%       |
| 15. | Lung/pleura | → Liver       | → Lung/pleura | 2.16%       | 15. | Lung/pleura | → LN (dist)   | → Adrenal     | 2.07%       |
| 16. | Lung/pleura | → LN (dist)   | → Bone        | 1.89%       | 16. | Lung/pleura | → LN (dist)   | → Bone        | 1.78%       |
| 17. | Lung/pleura | → Bone        | → Brain       | 1.81%       | 17. | Lung/pleura | → Bone        | → Brain       | 1.58%       |
| 18. | Lung/pleura | → Pericardium | → Lung/pleura | 1.79%       | 18. | Lung/pleura | → Bone        | → Bone        | 1.58%       |
| 19. | Lung/pleura | → Lung/pleura | → Deceased    | 1.75%       | 19. | Lung/pleura | → Lung/pleura | → Deceased    | 1.58%       |
| 20. | Lung/pleura | → LN (dist)   | → Brain       | 1.52%       | 20. | Lung/pleura | → LN (dist)   | → Ab Wall     | 1.48%       |
| 21. | Lung/pleura | → Bone        | → Liver       | 1.51%       | 21. | Lung/pleura | → Liver       | → Lung/pleura | 1.47%       |
| 22. | Lung/pleura | → Adrenal     | → Bone        | 1.32%       | 22. | Lung/pleura | → Brain       | → Lung/pleura | 1.32%       |
| 23. | Lung/pleura | → Liver       | → Deceased    | 1.29%       | 23. | Lung/pleura | → Lung/pleura | → Adrenal     | 1.13%       |
| 24. | Lung/pleura | → Chest Wall  | → Lung/pleura | 1.19%       | 24. | Lung/pleura | → Liver       | → Adrenal     | 1.10%       |
| 25. | Lung/pleura | → LN (dist)   | → Deceased    | 1.14%       | 25. | Lung/pleura | → Brain       | → Deceased    | 1.06%       |
| 26. | Lung/pleura | → Lung/pleura | → Adrenal     | 0.97%       | 26. | Lung/pleura | → Adrenal     | → Deceased    | 0.89%       |
| 27. | Lung/pleura | → Bone        | → LN (dist)   | 0.91%       | 27. | Lung/pleura | → LN (dist)   | → Lung/pleura | 0.89%       |
| 28. | Lung/pleura | → Liver       | → Adrenal     | 0.86%       | 28. | Lung/pleura | → LN (dist)   | → Muscles     | 0.89%       |
| 29. | Lung/pleura | → LN (dist)   | → Ab Wall     | 0.76%       | 29. | Lung/pleura | → Brain       | → Other CNS   | 0.79%       |
| 30. | Lung/pleura | → Brain       | → Liver       | 0.73%       | 30. | Lung/pleura | → Adrenal     | → Lung/pleura | 0.74%       |

e

|             | Adrenal | Bone  | Brain | Liver | LN(distant) | Lung/pleura |
|-------------|---------|-------|-------|-------|-------------|-------------|
| $EGFR^m$    | 0.720   | 1.230 | 0.864 | 1.769 | 1.070       | 0.933       |
| $EGFR^{wt}$ | 0.235   | 1.704 | 1.041 | 2.265 | 1.213       | 0.834       |
